# Supplementary material for: A natural calcite reference material for microbeam oxygen and carbon isotope analysis
Source: Royal Society of Chemistry journal article supplement (doi:10.1039/d5ja00488h), 2026-01-01
Supplement: d5ja00488h1.xlsx [file d5ja00488h1.xlsx]

## Sheet: Table S1
Table S1 Major elements (wt%) of the MNP calcite analyzed by EPMA.
Sample No.	CaO	MgO	MnO	FeO	SrO	Al2O3	BaO	NiO	TiO2	Total
1	55.6243	0.1574	0.9744	0.8847	0	0.0221	0.0299	0.0056	0	57.6984
2	55.5608	0.1616	0.9377	0.5226	0	0.1091	0.09	0	0	57.3818
3	54.2771	0.1023	1.0533	0.7407	0	0.0338	0.0897	0.0597	0.0672	56.4238
4	54.746	0.1273	1.0749	0.7376	0	0.0669	0.1123	0.0019	0.0477	56.9146
5	54.7307	0.13	1.0657	0.504	0	0.0724	0.0526	0.0075	0.0261	56.589
6	54.9453	0.1479	0.9147	0.8031	0	0.0407	0.03	0	0	56.8817
7	54.4898	0.1201	0.8375	0.3963	0	0.0769	0.0075	0.0448	0.0087	55.9816
8	54.1529	0.1106	0.8682	0.6325	0	0.0663	0.0898	0.0411	0	55.9614
9	55.7096	0.1272	1.0053	0.7131	0	0.1157	0.015	0	0.0521	57.738
10	54.223	0	0	0	0	0.0335	0	0	0.0044	54.2609
11	54.718	0	0	0.0284	0	0.0302	0.0751	0.0318	0.0348	54.9183
12	55.6187	0.0317	0	0.0019	0	0.0658	0.0751	0	0	55.7932
13	55.4548	0.0151	0	0	0	0.0229	0	0	0	55.4928
14	55.8443	0	0.0082	0.0189	0	0.0226	0	0.0337	0.0305	55.9582
15	56.9493	0.011	0	0	0	0.0155	0.0301	0	0	57.0059
16	55.5451	0.1244	0.9754	0.6024	0.3824	0.095	0.09	0	0	57.8147
17	54.4837	0.109	0.8396	0.3492	0.0841	0.069	0.0075	0.0672	0.0195	56.0288
18	54.4758	0.1478	0.9774	0.5175	0.4042	0.0207	0	0.0075	0	56.5509
19	54.7898	0.1311	1.0174	0.4791	0.3472	0.0496	0.0674	0.0187	0	56.9003
20	54.8537	0.1354	0.9981	0.459	0.3257	0.0611	0.0225	0	0	56.8555
21	54.0158	0.1592	1.0181	0.9078	0.0361	0.2353	0	0	0	56.3723
22	54.1818	0.1397	0.9755	0.7347	0	0.2633	0	0	0	56.295
23	55.8205	0.1757	0.996	0.7554	0.1099	0.0997	0	0	0	57.9572
24	55.5932	0.1119	1.038	0.498	0.1923	0.0603	0.0599	0	0.0174	57.571
25	55.6304	0.2161	1.1083	0.9491	0	0.1209	0.03	0	0	58.0548
26	55.4321	0.1844	1.0509	0.8029	0	0.0285	0	0	0.026	57.5248
27	54.9562	0.1726	0.9652	0.7178	0	0.0946	0.0374	0	0	56.9438
28	55.4299	0.1342	1.008	0.617	0	0.0554	0.0901	0	0	57.3346
29	55.0314	0.1466	0.9837	0.5795	0	0.0314	0	0	0	56.7726
30	54.9918	0.1202	0.9656	0.459	0	0.0958	0	0.0019	0	56.6343
31	56.647	0.1671	1.0496	0.7105	0.3309	0.0199	0	0.0186	0	58.9436
32	54.6269	0.1688	0.9752	0.6531	0.0554	0.088	0.09	0	0.0218	56.6792
33	56.0122	0.1534	1.084	0.6399	0.3035	0.4167	0	0.0205	0	58.6302
34	55.0424	0.1352	1.0969	0.475	0.3687	0.0935	0.015	0.0242	0	57.2509
35	55.6278	0.127	0.9258	0.5907	0.2447	0.4137	0.0225	0.0075	0.0652	58.0249
36	55.5802	0.1395	0.9731	0.6097	0.1954	0.3378	0	0.0224	0.0304	57.8885
37	54.0565	0.12	0.9784	0.4226	0.4409	0.198	0	0.0448	0	56.2612
38	55.2709	0.0939	0.9068	0.5075	0.328	0.0071	0.0524	0.0187	0	57.1853
39	55.1601	0.1157	0.9045	0.3734	0.6099	0.1293	0	0	0	57.2929
40	54.891	0.2073	1.1009	0.7577	0.2661	0.1498	0.0674	0.0205	0	57.4607
AVE	55.1298	0.12196	0.841308	0.528807	0.125635	0.10072	0.03373	0.012465	0.011295
2SD	1.35531	0.109247	0.72646	0.529034	0.3428	0.202786	0.0727981	0.036368	0.0383365

## Sheet: Table S2
Table S2 Trace elements of the MNP calcite analyzed by LA-ICP-MS.
Sample No.	La	Ce	Pr	Nd	Sm	Eu	Gd	Tb	Dy	Ho	Er	Tm	Yb	Lu
1	346.273	789.203	86.7703	336.011	45.5572	10.6467	28.0386	3.04683	14.7632	2.61758	6.83689	0.944016	6.12613	0.93272
2	525.109	1018.8	108.686	413.413	55.9304	12.7606	35.4239	3.73949	18.3377	3.23546	8.39654	1.14976	7.02993	0.969633
3	535.813	1040.17	104.839	398.372	48.3837	10.8384	29.4105	2.94565	14.7035	2.68484	7.1508	1.04537	6.60374	0.978399
4	356.597	829.948	90.6549	356.805	46.7514	10.344	28.3142	2.85681	14.2809	2.48845	6.39552	0.86733	5.79943	0.840885
5	436.243	846.837	89.2267	342.244	47.975	10.8704	29.166	3.21252	15.5422	2.94974	7.79408	1.09371	7.21942	0.865848
6	304.702	731.01	87.97	364.575	56.6668	13.5955	36.4177	4.1376	20.5116	3.7583	10.1395	1.41605	8.41228	1.28826
7	345.458	788.948	88.1894	347.206	45.8457	10.0479	26.1613	2.79405	13.238	2.23227	6.61528	0.902879	6.29459	0.889246
8	338.839	788.216	94.2813	381.352	61.3789	15.3435	43.8743	5.00246	25.3527	4.80843	12.3878	1.75245	11.3415	1.48097
9	302.621	705.692	84.7701	343.737	53.9025	13.115	36.6211	4.28581	21.0188	3.87299	9.60826	1.34615	8.59414	1.11909
10	341.382	765.615	88.115	365.933	61.1174	14.6364	42.2638	4.8874	23.8328	4.32877	11.3788	1.56883	9.37089	1.31152
11	266.688	679.183	84.8006	351.921	55.8983	13.5575	37.5807	4.13432	20.9465	3.77061	9.28771	1.38013	8.79988	1.20409
12	219.567	607.31	79.3445	341.65	60.4117	14.8273	41.5431	4.59933	23.6599	4.2691	10.9832	1.55163	9.49885	1.33075
13	402.182	842.401	95.0063	360.077	52.8223	11.859	33.8485	3.74296	19.2794	3.49821	9.17814	1.246	8.41604	1.11321
14	196.836	554.32	73.7363	326.284	62.398	15.5646	44.3197	5.20877	26.2924	4.62546	11.9348	1.6097	9.93663	1.34963
15	290.75	678.546	82.6014	345.238	54.3078	13.1236	36.8893	4.21059	20.6273	3.85348	9.77267	1.3797	9.24496	1.26881
16	347.407	776.995	93.3571	355.823	53.177	12.6224	33.9554	3.77104	18.2158	3.28189	8.79119	1.18017	8.12656	1.05534
17	196.475	554.046	72.6843	314.187	52.5171	13.327	37.3942	4.25652	21.295	3.90542	9.92038	1.43508	9.05362	1.21645
18	163.831	461.229	61.3621	270.841	53.6591	13.5888	38.6659	4.52331	22.7067	4.31507	11.5273	1.59739	10.7309	1.42788
19	162.868	470.385	63.2485	280.397	56.4473	14.4252	42.119	5.52425	27.8012	5.38874	14.8278	2.08565	14.1154	2.0911
20	333.538	796.893	92.2903	370.765	52.9544	12.1169	31.6663	3.37321	16.8176	3.00328	7.52886	1.05271	6.5767	0.864786
21	272.132	705.04	88.6893	369.86	60.7178	14.9668	41.1633	4.60815	22.9057	4.00837	10.1701	1.31658	8.24813	1.07571
22	270.036	704.141	85.5611	369.766	57.6157	13.5883	38.6048	4.05712	21.0717	3.89511	10.6509	1.53589	9.58939	1.27029
23	381.398	811.312	90.044	348.833	52.3648	12.7063	33.1172	3.67764	18.1936	3.51125	8.79714	1.26635	8.00463	1.1265
24	385.929	836.681	96.5542	376.692	57.6533	13.3389	37.4524	3.96904	18.5014	3.5084	8.63438	1.12527	7.59277	0.995205
25	371.859	850.012	95.7786	391.48	61.8911	15.3438	41.3001	4.60586	22.8279	4.26102	10.9884	1.54698	10.2127	1.27914
26	265.763	669.915	79.4022	327.261	50.9335	13.1282	34.6145	4.08899	19.8829	3.83528	10.1657	1.44889	9.15045	1.37438
27	357.556	820.836	94.856	391.385	57.9799	13.4701	37.1276	4.18828	20.5265	3.63013	9.95057	1.3002	8.33777	1.2982
28	204.505	586.093	79.6956	349.882	68.0071	16.5281	45.5304	5.2214	25.6026	4.60472	11.8675	1.48772	10.2961	1.38689
29	212.335	598.42	78.4746	336.171	62.3783	15.6058	43.2977	4.87966	23.9127	4.39569	11.3374	1.53207	10.2853	1.38366
30	324.611	786.648	96.9033	416.006	73.3802	17.7837	51.6684	5.77976	29.5449	5.33774	14.248	1.96985	12.3976	1.72401
31	170.88	526.546	70.2287	303.133	60.785	15.8541	45.7456	5.40694	26.223	5.16344	13.0544	1.75941	10.9633	1.52908
32	191.038	483.776	68.6659	282.358	63.1808	17.334	53.2805	6.60278	36.4998	6.99753	18.3907	2.57043	17.2963	2.12365
33	197.628	544.086	71.37	296.175	52.1272	12.6274	35.5441	4.06198	20.5947	3.66962	10.2123	1.37844	9.65267	1.25538
34	269.714	583.293	66.4826	268.371	42.7108	11.252	32.134	3.96735	21.5025	3.79812	10.1318	1.41091	9.70443	1.20727
35	252.642	671.767	88.1612	389.705	81.6059	20.8393	63.6116	7.75621	40.6607	7.85871	20.1228	2.70959	17.6813	2.35447
36	247.849	639.04	86.0395	379.695	82.9531	22.5566	64.7849	8.52593	43.1651	7.79955	20.2462	2.79754	18.1187	2.37402
37	266.644	513.993	56.5308	219.211	36.3419	9.84138	28.3919	3.53537	19.7669	3.68958	10.3168	1.46078	10.1417	1.47972
38	195.723	537.775	67.9682	296.267	50.5935	12.772	35.8968	4.01878	20.5299	3.92328	9.99833	1.31787	8.9149	1.26985
39	371.5	848.97	97.3048	381.849	56.2735	12.9647	34.6802	3.83385	18.7847	3.5008	9.03374	1.15775	8.36624	1.08889
40	353.428	830.481	95.8164	387.59	57.0953	13.7575	37.1999	4.21886	21.209	4.04467	10.412	1.50588	9.70728	1.34098
41	368.055	854.684	100.113	395.304	62.9907	15.1052	39.7953	4.3913	21.0383	3.83148	9.4632	1.23688	8.57645	1.09195
42	270.926	703.121	83.8677	344.948	55.9681	13.2433	37.4515	4.08916	20.1963	3.68439	9.20991	1.32079	8.47234	1.08826
43	231.966	624.075	78.5327	331.015	51.7123	12.4036	34.4748	3.74684	18.295	3.2251	8.00312	1.14935	7.55717	0.992126
44	585.984	1018.99	104.703	379.317	48.9964	10.8355	28.6871	2.90172	14.1746	2.53296	6.99853	0.882417	5.95829	0.780399
45	407.922	864.893	95.471	363.024	49.2298	11.0523	28.0812	2.98899	14.5644	2.61579	6.76064	0.934061	6.26494	0.901593
46	240.195	637.48	81.1286	341.72	54.6436	13.5731	35.9111	3.88065	19.5958	3.58342	9.02161	1.21222	7.58005	0.994852
47	180.719	551.973	73.6861	330.45	55.7457	14.0835	39.2803	4.41433	22.393	3.9786	10.5127	1.3362	9.14773	1.32205
48	361.532	820.4	94.6877	381.567	59.3489	14.4449	40.2645	4.54371	22.8377	4.47912	12.033	1.63773	10.9892	1.49508
49	280.306	677.962	86.1748	373.46	76.1004	19.4954	60.2731	7.21931	40.3172	7.729	19.9869	2.74512	17.91	2.32569
50	250.702	638.31	82.8804	352.077	68.0127	18.0572	54.9444	6.96111	37.7116	7.06556	19.088	2.72354	17.9929	2.56208
51	257.711	641.596	79.3312	343.783	56.1343	13.8443	37.9429	4.36101	22.3598	3.97474	10.2726	1.42842	9.51601	1.361
52	257.046	690.056	86.9937	376.498	65.8497	16.7726	48.5466	5.58048	28.3383	5.3364	13.9021	2.01116	12.9192	1.74237
53	231.187	605.117	75.1095	314.237	48.2338	11.2276	29.2381	3.13866	14.7332	2.79682	6.55703	0.843923	5.92729	0.788618
54	381.881	836.054	94.023	370.367	51.0445	12.2131	34.2391	3.58892	17.3915	3.30734	8.46352	1.11467	8.01441	1.2016
55	264.966	686.302	83.9847	352.097	55.9442	13.0731	35.9212	3.95087	18.6284	3.40403	8.48539	1.19271	8.10384	1.13815
56	199.164	548.516	72.671	320.936	58.4718	14.6634	40.5235	4.52341	22.2935	4.19528	10.7976	1.51452	9.98346	1.37747
57	316.034	742.666	91.6025	379.432	64.6555	16.5263	45.7596	5.24894	28.2377	5.13834	13.7791	1.9414	12.5901	1.6763
58	483.319	976.373	103.754	400.27	51.3573	12.4281	34.3375	3.72179	17.9094	3.3128	8.61704	1.15956	6.84621	0.993528

## Sheet: Table S3
Table S3 C isotopic compositions of the MNP calcite in session 1 analyzed by LA-MC-ICP-MS.
Number	δ13C (‰)	2SE (‰)	AVE	2SD	N
1	-6.73005	0.441143	-6.77038	0.334154	85
2	-6.90662	0.444511
3	-6.74001	0.464915
4	-6.82074	0.440743
5	-7.06526	0.435826
6	-6.57286	0.499997
7	-6.96296	0.466863
8	-6.50823	0.446899
9	-6.42354	0.443966
10	-6.97834	0.456917
11	-6.87544	0.513067
12	-6.96364	0.522485
13	-6.79067	0.440457
14	-6.85174	0.514006
15	-6.99485	0.575622
16	-6.47206	0.972767
17	-6.71874	0.498384
18	-6.71999	0.53456
19	-6.83392	0.53216
20	-6.30569	0.498778
21	-6.40205	0.483235
22	-6.4178	0.549554
23	-6.8816	0.301051
24	-6.84534	0.301912
25	-6.82686	0.317362
26	-6.87697	0.337399
27	-6.78774	0.334288
28	-6.65958	0.349673
29	-6.91587	0.479056
30	-6.82763	0.512589
31	-6.94009	0.535492
32	-7.06763	0.535011
33	-6.66323	0.518343
34	-6.74124	0.545383
35	-6.73019	0.545464
36	-6.8318	0.524765
37	-6.90822	0.547009
38	-7.0376	0.563029
39	-6.65864	0.563844
40	-7.07932	0.591818
41	-7.07447	0.575357
42	-6.67647	0.503148
43	-6.79765	0.503721
44	-6.64623	0.48576
45	-6.83426	0.519145
46	-6.83653	0.569491
47	-6.85543	0.578791
48	-6.68273	0.59976
49	-6.65079	0.626161
50	-6.74394	0.590159
51	-6.7139	0.568064
52	-6.74319	0.560175
53	-7.04503	0.47058
54	-6.67804	0.502422
55	-6.73684	0.561855
56	-6.78701	0.474941
57	-6.91628	0.471769
58	-6.94846	0.45245
59	-6.59496	0.44824
60	-6.63568	0.471322
61	-6.91585	0.473872
62	-6.57231	0.467895
63	-6.72745	0.462565
64	-6.52671	0.455535
65	-6.57524	0.422444
66	-6.65139	0.441056
67	-6.88839	0.441916
68	-6.58339	0.433069
69	-6.61606	0.450139
70	-6.56662	0.483735
71	-6.63515	0.463766
72	-6.62669	0.421402
73	-6.78551	0.414927
74	-6.82776	0.442628
75	-6.98148	0.490126
76	-6.72703	0.473771
77	-6.83415	0.492176
78	-6.97062	0.476063
79	-6.70589	0.480922
80	-6.95062	0.484751
81	-6.90054	0.452139
82	-6.85677	0.449656
83	-6.73977	0.43766
84	-6.71109	0.442594
85	-6.67305	0.443898

## Sheet: Table S4
Table S4 C isotopic compositions of the MNP calcite in session 2 analyzed by LA-MC-ICP-MS.
Number	δ13C (‰)	2SE (‰)	AVE	2SD	N
1	-6.84538	0.484541	-6.79016	0.282249	58
2	-6.8056	0.472921
3	-6.58639	0.490658
4	-6.75274	0.486727
5	-6.60912	0.551895
6	-6.70956	0.530156
7	-7.00128	0.493151
8	-6.90933	0.452893
9	-6.87255	0.491977
10	-6.65625	0.529296
11	-6.48238	0.560932
12	-6.68502	0.528996
13	-7.05595	0.493418
14	-6.8521	0.491971
15	-6.61212	0.588279
16	-6.94307	0.580333
17	-6.84057	0.494914
18	-6.89219	0.55559
19	-6.62251	0.563726
20	-6.57516	0.555476
21	-6.9072	0.550199
22	-7.00847	0.513844
23	-6.49096	0.496952
24	-6.7174	0.489715
25	-6.56173	0.955409
26	-6.89398	0.513601
27	-6.79723	0.496461
28	-6.82246	0.507368
29	-6.69804	0.675054
30	-6.74095	0.50003
31	-6.89463	0.522913
32	-6.80776	0.493424
33	-6.95288	0.491141
34	-6.8481	0.386946
35	-7.09645	0.39349
36	-6.88785	0.40293
37	-6.73741	0.418422
38	-6.74502	0.396686
39	-6.80985	0.434821
40	-6.80898	0.430417
41	-6.68698	0.419823
42	-6.52065	0.40031
43	-6.84722	0.415165
44	-6.9197	0.410253
45	-6.76031	0.37769
46	-6.94049	0.380719
47	-6.73117	0.390653
48	-6.88563	0.428662
49	-6.92661	0.403496
50	-6.6529	0.391877
51	-6.77805	0.415977
52	-6.90706	0.412692
53	-6.82199	0.430264
54	-6.6624	0.485089
55	-6.91675	0.409601
56	-6.93667	0.403184
57	-6.713	0.51408
58	-6.685	0.517916

## Sheet: Table S5
Table S5 C isotopic compositions of the MNP calcite in session 3 analyzed by LA-MC-ICP-MS.
Number	δ13C (‰)	2SE (‰)	AVE	2SD	N
1	-6.63691	0.508554	-6.79005	0.316413	55
2	-6.60139	0.561823
3	-6.88342	0.449117
4	-6.99895	0.461978
5	-6.76155	0.425525
6	-6.70502	0.431891
7	-7.00443	0.565639
8	-6.70713	0.383688
9	-6.62612	0.37186
10	-6.82958	0.382709
11	-6.76104	0.360851
12	-6.95138	0.372602
13	-6.5889	0.362098
14	-6.553	0.386902
15	-6.80257	0.390878
16	-6.9644	0.388011
17	-6.81148	0.42284
18	-6.52697	0.394467
19	-6.52013	0.434381
20	-6.62108	0.467859
21	-6.73606	0.403468
22	-6.94725	0.357473
23	-6.48521	0.386138
24	-6.75498	0.617104
25	-6.79791	0.644737
26	-6.85717	0.465511
27	-6.71966	0.656002
28	-6.84132	0.451678
29	-6.7424	0.43624
30	-6.73307	0.382133
31	-6.57129	0.343549
32	-6.8971	0.339628
33	-6.89487	0.34272
34	-6.75153	0.384139
35	-6.6547	0.401627
36	-7.12731	0.449545
37	-6.86194	0.509525
38	-6.8671	0.466242
39	-6.77426	0.415256
40	-6.86416	0.415306
41	-6.87047	0.463442
42	-6.48229	0.676132
43	-6.87099	0.503155
44	-6.96284	0.396048
45	-6.85938	0.392189
46	-6.8529	0.406103
47	-7.17515	0.37805
48	-6.94468	0.391419
49	-6.93129	0.400826
50	-6.59124	0.579236
51	-6.66099	0.559703
52	-6.75252	0.328978
53	-6.8282	0.394153
54	-7.01757	0.388704
55	-6.91751	0.367263

## Sheet: Table S6
Table S6 C isotopic compositions of the MNP calcite in session 4 analyzed by LA-MC-ICP-MS.
Number	δ13C (‰)	2SE (‰)	AVE	2SD	N
1	-6.73149	0.356419	-6.81273	0.415856	85
2	-6.56825	0.389321
3	-6.63772	0.481129
4	-7.04324	0.371027
5	-6.43153	0.474011
6	-6.8924	0.629224
7	-6.61265	0.594464
8	-6.97032	0.549
9	-6.74013	0.575933
10	-6.74504	0.591703
11	-7.10693	0.564987
12	-6.40965	0.569034
13	-6.79385	0.52315
14	-6.96067	0.543293
15	-6.96167	0.5521
16	-6.81492	0.57835
17	-6.80641	0.613476
18	-6.69759	0.580804
19	-6.83619	0.584598
20	-6.62041	0.617553
21	-6.58755	0.595861
22	-6.86908	0.644102
23	-7.14068	0.674115
24	-6.55904	0.679439
25	-6.52389	0.663188
26	-6.95975	0.678137
27	-7.19624	0.67958
28	-6.55389	0.650689
29	-6.56214	0.633874
30	-6.85873	0.654282
31	-6.47026	0.667386
32	-7.00718	0.626901
33	-7.10824	0.613206
34	-6.98261	0.589193
35	-6.86562	0.593326
36	-6.96787	0.576823
37	-7.18056	0.580736
38	-6.5952	0.69458
39	-6.66271	0.617809
40	-7.26975	0.575479
41	-6.84494	0.575008
42	-6.42105	0.581896
43	-6.88234	0.592656
44	-6.75434	0.62163
45	-6.88253	0.57022
46	-6.7064	0.593882
47	-6.87929	0.569095
48	-7.18312	0.558044
49	-7.07849	0.600774
50	-6.85769	0.637222
51	-6.89422	0.59193
52	-6.71527	0.625382
53	-7.12233	0.657983
54	-6.90691	0.598791
55	-6.78058	0.580718
56	-7.04371	0.536213
57	-6.93783	0.548641
58	-6.82776	0.541692
59	-6.93542	0.476708
60	-6.72513	0.507903
61	-6.49346	0.568237
62	-6.59416	0.487045
63	-6.79114	0.534405
64	-6.69291	0.520129
65	-6.80062	0.516891
66	-6.85393	0.536928
67	-6.97115	0.54201
68	-6.90301	0.538531
69	-6.78485	0.530174
70	-6.96233	0.518285
71	-6.99372	0.495139
72	-6.7806	0.464939
73	-6.67034	0.484512
74	-6.63109	0.481795
75	-6.64133	0.508502
76	-6.84842	0.530229
77	-7.2575	0.664135
78	-6.66862	0.585863
79	-6.4541	0.505566
80	-6.80574	0.517873
81	-6.36519	0.508815
82	-7.05956	0.831692
83	-6.85457	0.827405
84	-6.64741	0.478653
85	-6.87477	0.482115

## Sheet: Table S7
Table S7 C isotopic compositions of the MNP calcite in session 5 analyzed by LA-MC-ICP-MS.
Number	δ13C (‰)	2SE (‰)	AVE	2SD	N
1	-6.69359	0.495228	-6.86305	0.449152	186
2	-6.82894	0.504828
3	-6.88567	0.479806
4	-6.84333	0.508859
5	-6.93681	0.523576
6	-6.95844	0.492983
7	-6.87301	0.463057
8	-6.86054	0.865995
9	-6.8079	0.865858
10	-7.01917	0.48635
11	-6.95682	0.485695
12	-6.32552	0.587022
13	-6.88719	0.432922
14	-6.7471	0.561447
15	-7.07609	0.578416
16	-6.90399	0.44686
17	-6.74758	0.472772
18	-6.94962	0.46011
19	-7.14251	0.484948
20	-6.96354	0.459956
21	-7.16495	0.604664
22	-6.78201	0.504604
23	-6.68276	0.537449
24	-6.8103	0.496013
25	-6.8436	0.491522
26	-6.92269	0.498638
27	-6.92776	0.466944
28	-7.21704	0.574141
29	-7.04815	0.518895
30	-6.82421	0.454864
31	-7.18981	0.471432
32	-6.75371	0.496054
33	-6.54149	0.523924
34	-6.71325	0.519366
35	-7.06731	0.514931
36	-6.82506	0.507951
37	-6.94926	0.542691
38	-6.80389	0.582893
39	-6.47369	0.559641
40	-6.75347	0.582605
41	-6.78985	0.529774
42	-6.9443	0.541315
43	-6.85955	0.209791
44	-6.9197	0.219226
45	-6.88667	0.231409
46	-6.95561	0.227747
47	-6.64687	0.289083
48	-6.90811	0.217521
49	-6.82444	0.215921
50	-7.04414	0.211773
51	-6.90863	0.233711
52	-6.7823	0.242112
53	-6.79206	0.222991
54	-6.84458	0.215277
55	-6.81439	0.248422
56	-6.6347	0.243053
57	-6.63972	0.235219
58	-6.73685	0.21953
59	-6.74702	0.232584
60	-6.91571	0.23823
61	-6.74866	0.228453
62	-6.78711	0.235015
63	-6.80715	0.357339
64	-6.95094	0.310829
65	-6.83886	0.251237
66	-6.69962	0.278675
67	-6.8807	0.309369
68	-6.80417	0.405838
69	-7.06149	0.439265
70	-6.99997	0.411294
71	-7.12696	0.422455
72	-6.55214	0.447185
73	-6.9072	0.497789
74	-6.89341	0.506888
75	-7.18944	0.472513
76	-6.76567	0.456053
77	-6.46147	0.676517
78	-6.66682	0.56066
79	-6.81939	0.577437
80	-6.72439	0.535742
81	-6.68989	0.516235
82	-6.97054	0.537582
83	-7.16158	0.488008
84	-6.96098	0.499796
85	-6.74273	0.458665
86	-7.14989	0.490206
87	-6.8656	0.438248
88	-7.12783	0.493858
89	-6.65187	0.510284
90	-6.89436	0.530385
91	-6.87274	0.483433
92	-6.75256	0.328525
93	-6.81983	0.29698
94	-6.79488	0.295134
95	-6.64914	0.290751
96	-6.91939	0.279782
97	-7.0667	0.419595
98	-7.23591	0.425715
99	-6.97985	0.45916
100	-6.47917	0.501485
101	-6.66867	0.369192
102	-6.96063	0.395867
103	-6.82479	0.356724
104	-6.6325	0.510817
105	-6.71235	0.542241
106	-7.04826	0.283214
107	-7.13619	0.276503
108	-7.31316	0.247732
109	-7.14195	0.276449
110	-7.1364	0.25959
111	-7.01199	0.24975
112	-6.99938	0.281694
113	-7.02903	0.28229
114	-6.94508	0.295594
115	-7.12176	0.328001
116	-6.71442	0.271313
117	-6.89465	0.260223
118	-7.00431	0.275823
119	-6.95109	0.278652
120	-6.74568	0.278271
121	-6.55778	0.296144
122	-6.58642	0.298121
123	-6.74576	0.271718
124	-6.69206	0.295972
125	-6.57197	0.285398
126	-6.81048	0.30589
127	-6.6341	0.303564
128	-6.72873	0.328037
129	-6.86281	0.298776
130	-6.91819	0.312234
131	-6.43505	0.265056
132	-7.32831	0.255514
133	-6.5901	0.323105
134	-6.67067	0.262549
135	-6.71164	0.271662
136	-7.13671	0.274816
137	-7.05359	0.255825
138	-7.28025	0.272236
139	-7.03425	0.268183
140	-7.23292	0.333366
141	-6.99292	0.340631
142	-7.17078	0.271611
143	-7.17319	0.261982
144	-7.20566	0.275794
145	-7.07644	0.247166
146	-7.01778	0.26482
147	-6.73564	0.267403
148	-6.88814	0.351478
149	-6.89011	0.339772
150	-6.70884	0.258978
151	-6.89024	0.281412
152	-7.07552	0.28715
153	-6.81468	0.354812
154	-6.57026	0.527251
155	-6.8524	0.561215
156	-7.27811	0.494114
157	-7.0536	0.606358
158	-7.0856	0.584534
159	-6.22047	0.514612
160	-6.99862	0.58939
161	-6.52035	0.57005
162	-6.89978	0.617734
163	-6.56859	0.61452
164	-6.84279	0.562429
165	-6.77231	0.502844
166	-6.6539	0.545272
167	-7.07135	0.553067
168	-6.2869	0.675085
169	-6.85353	0.553101
170	-6.96745	0.532565
171	-6.83667	0.550356
172	-6.18848	0.49534
173	-6.53257	0.528662
174	-6.56719	0.488783
175	-6.9032	0.520361
176	-7.28873	0.50425
177	-6.50437	0.541892
178	-7.62921	0.546846
179	-6.93643	0.561812
180	-6.85458	0.54131
181	-6.17866	0.512515
182	-6.73016	0.573338
183	-7.0218	0.585176
184	-6.93569	0.68496
185	-7.30689	0.565395
186	-6.63408	0.654838

## Sheet: Table S8
Table S8 O isotopic compositions of the MNP calcite analyzed by SIMS.
		Number	δ18O (‰)	2SE (‰)
Particle1	Session 1	1	-22.6713	0.106509
		2	-22.5055	0.0785235
		3	-22.6173	0.104775
		4	-22.6919	0.114302
		5	-22.6019	0.0739505
		6	-22.5313	0.10468
		7	-22.5605	0.0975225
		8	-22.3148	0.104085
		9	-22.3269	0.150085
		10	-22.4412	0.106379	Particle 1
		11	-22.4814	0.133517	Session 1
		12	-22.6576	0.140104	AVE	2SD	N
		13	-22.5321	0.122225	-22.5334	0.24115	13
Particle 2	Session 2	1	-22.53	0.131306
		2	-22.3754	0.128078
		3	-22.4616	0.138196
		4	-22.5349	0.136744
		5	-22.5953	0.120263
		6	-22.5055	0.124242
		7	-22.5474	0.123667
		8	-22.4401	0.208836
		9	-22.6755	0.0897249	Particle 2
		10	-22.4287	0.117919	Session 2
		11	-22.6168	0.147646	AVE	2SD	N
		12	-22.5287	0.107321	-22.52	0.170155	12
Particle 3	Session 3	1	-22.6092	0.171722
		2	-22.468	0.123495
		3	-22.6548	0.115748
		4	-22.7067	0.110203
		5	-22.5519	0.12851
		6	-22.4113	0.109629
		7	-22.2848	0.136304	Session 3				Particle 3
		8	-22.3372	0.131663	AVE	2SD	N		AVE	2SD	N
		9	-22.3985	0.104857	-22.4914	0.293815	9		-22.4437	0.333571	18
Particle 3	Session 4	1	-22.3215	0.146442
		2	-22.4888	0.066298
		3	-22.64	0.148638
		4	-22.1862	0.12769
		5	-22.3594	0.143964
		6	-22.1323	0.140029
		7	-22.4664	0.0843274	Session 4
		8	-22.6433	0.120241	AVE	2SD	N
		9	-22.3271	0.112991	-22.3961	0.36014	9
Particle 4	Session 5	1	-22.331	0.114632
		2	-22.4652	0.158891
		3	-22.3859	0.0874268
		4	-22.5391	0.153086
		5	-22.415	0.0946911
		6	-22.489	0.140853	Particle 4
		7	-22.3267	0.114589	Session 5
		8	-22.5838	0.128741	AVE	2SD	N
		9	-22.2252	0.088979	-22.4179	0.227513	9
Particle 5	Session 6	1	-22.155	0.133697
		2	-22.2968	0.119786
		3	-22.3252	0.127273
		4	-22.4759	0.141016
		5	-22.4398	0.12257
		6	-22.2037	0.118671	Particle 5
		7	-22.1608	0.124886	Session 6
		8	-22.2812	0.127558	AVE	2SD	N
		9	-22.1051	0.15687	-22.2715	0.25673	9
Particle 6	Session 7	1	-22.3139	0.09174
		2	-22.4258	0.175636
		3	-22.0768	0.142476
		4	-22.2545	0.0981278
		5	-22.2411	0.134375
		6	-22.3136	0.0953645
		7	-22.1831	0.132799
		8	-22.492	0.133926	Session 7				Particle 3
		9	-22.3806	0.108178	AVE	2SD	N		AVE	2SD	N
		10	-22.5784	0.0861746	-22.326	0.297617	10		-22.2962	0.260452	19
Particle 6	Session 8	1	-22.0605	0.126451
		2	-22.3309	0.102188
		3	-22.2953	0.132028
		4	-22.1904	0.147075
		5	-22.3315	0.147855
		6	-22.3498	0.144874	Particle 1
		7	-22.3508	0.132479	Session 8
		8	-22.3111	0.115645	AVE	2SD	N
		9	-22.1485	0.172368	-22.2632	0.208895	9
